# Supplementary material for: A bivalent promoter contributes to stress-induced plasticity of CXCR4 in Ewing sarcoma
Source: PubMed Central journal article supplement (PMC5308690; doi:10.18632/oncotarget.11240), 2016-08-12
Supplement: oncotarget-07-61775-s001.pdf [file oncotarget-07-61775-s001.pdf]

## A bivalent promoter contributes to stress-induced plasticity of CXCR4 in Ewing sarcoma

### SUPPLEMENTARY FIGURE AND TABLE

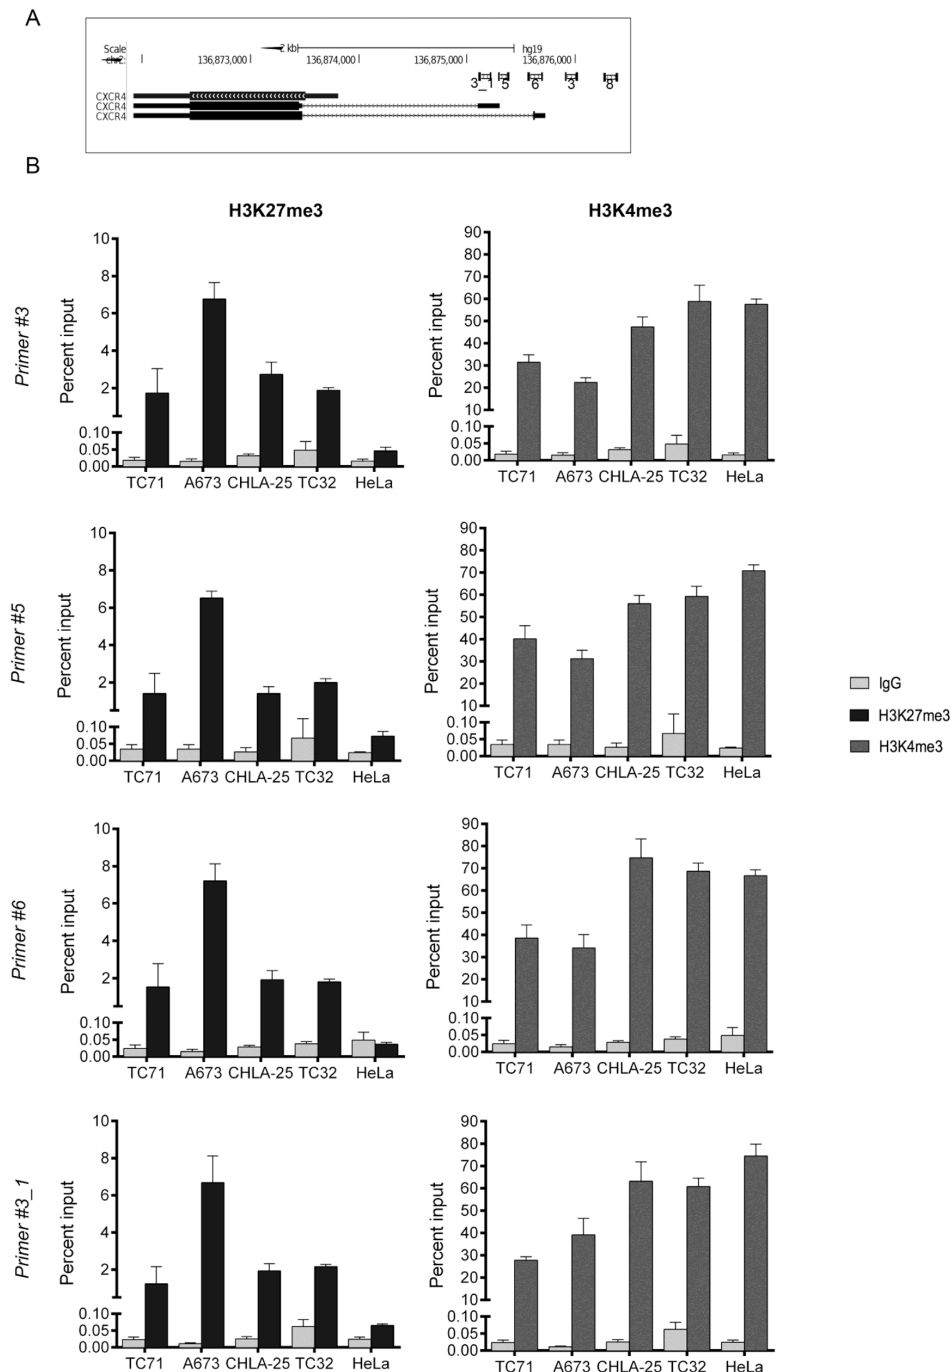

**Supplementary Figure S1: Additional primer pairs for directed ChIP-PCR of *CXCR4* promoter.** A. Map of primer pairs designed for the *CXCR4* promoter region. Primer pair #8 was used for studies shown in main figures B. ChIP-qPCR using additional primers confirmed enrichment of H3K4me3 and H3K27me3 at the *CXCR4* promoter in Ewing sarcoma cells and only H3K4me3 in HeLa cells. Data represented as mean  $\pm$  SEM of three independent experiments.

Supplementary Table S1: PCR primer sequences

| CXCR4 Promoter |                                    |                                    |           |
|----------------|------------------------------------|------------------------------------|-----------|
| Primer pair    | Forward                            | Reverse                            | Size (bp) |
| #3             | 5'- GGG TGG TCG GTA GTG AGT CC -3' | 5'- CAG AGA GAC GCG TTC CTA GC -3' | 120       |
| #5             | 5'- ACG CCT TCT CTG CAG TTG TG -3' | 5'- TTC CAG TGG CTG CAT GTG TC -3' | 105       |
| #6             | 5'- GGG CTG CGC TCT AAG TTC AA -3' | 5'- TAG CAA AGT GAC GCC GAG G -3'  | 144       |
| #3_1           | 5'- GGG ATG TCT TGG AGC GAG TT -3' | 5'- AAC AGT CAC CAG GCG CTT AA -3' | 122       |
| #8             | 5'- TCA CTA GGG TCA GGT GCA GA -3' | 5'- TCG CGA ATT GGT TAC CGC TA -3' | 131       |
